# Supplementary material
Source: PubMed Central journal article supplement (PMC3539690)
Supplement: supp_1202342_12-02342_S1-2.pdf [file supp_1202342_12-02342_S1-2.pdf]

Supplementary Figure 1

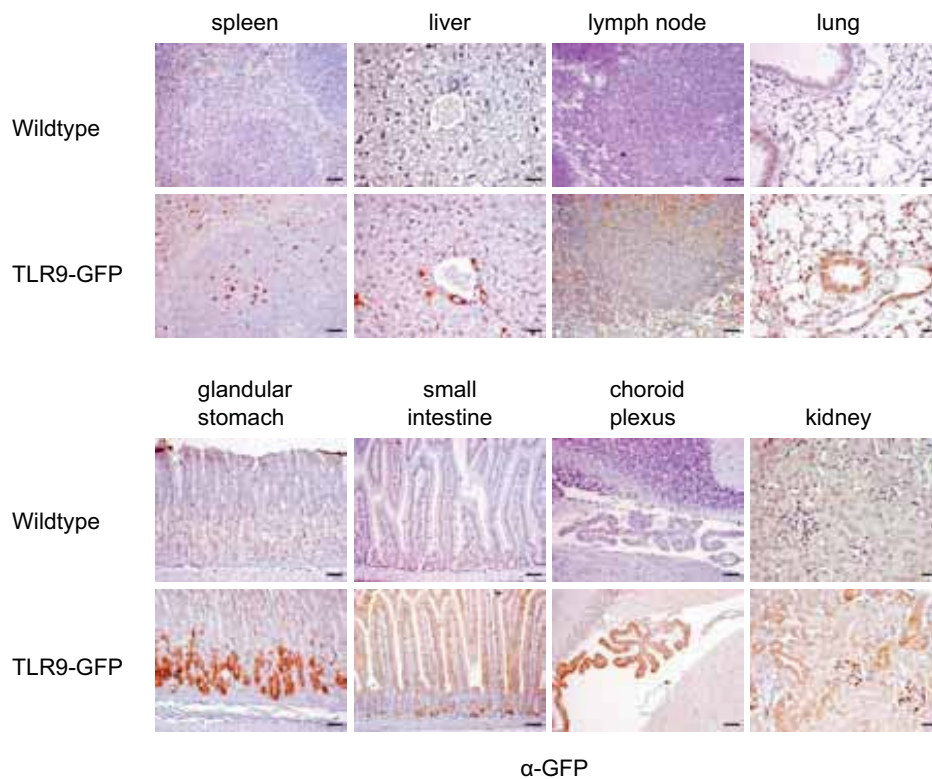

**Suppl. FIGURE 1.** TLR9-GFP is expressed in different tissues of TLR9-GFP transgenic mice. Organs and tissue of 12-week-old mice heterozygous for transgenic TLR9-GFP (TLR9-GFP<sup>+/+</sup>/WT) were formalin fixed, paraffin embedded and stained with an anti-GFP antibody. Data is representative of two TLR9-GFP<sup>+/+</sup>/WT mice and two WT littermates. Scale bar = 25  $\mu$ m for lung and kidney and 50  $\mu$ m for all other organs.

Supplementary Figure 2

A

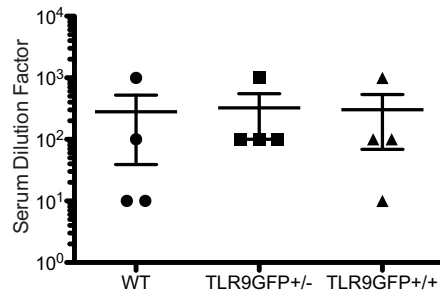

B

Table I

| Lymphocyte populations in periphery (%)                           |      |             |         |             |
|-------------------------------------------------------------------|------|-------------|---------|-------------|
|                                                                   | WT   | TLR9-GFP/WT | TLR9 KO | TLR9-GFP/KO |
| Spleen                                                            |      |             |         |             |
| B220 <sup>+</sup> CD3 <sup>+</sup>                                | 2.2  | 1.7         | 1.7     | 1.5         |
| B220 <sup>+</sup> CD23 <sup>+</sup>                               | 72.7 | 79.8        | 76.9    | 72.7        |
| B220 <sup>+</sup> CD21 <sup>+</sup>                               | 10.6 | 6.4         | 6.4     | 9.3         |
| CD4 <sup>+</sup>                                                  | 61.2 | 50.8        | 58.7    | 60.0        |
| CD8 <sup>+</sup>                                                  | 28.6 | 36.6        | 28.7    | 21.5        |
| !                                                                 |      |             |         |             |
| B cell subsets at different developmental stages (%) <sup>a</sup> |      |             |         |             |
| Bone Marrow                                                       |      |             |         |             |
| Pro B                                                             | 13.6 | 20.7        | 16.1    | 23.0        |
| Pre B                                                             | 42.5 | 39.2        | 32.5    | 23.8        |
| Immature B                                                        | 40.3 | 36.6        | 47.8    | 51.1        |
| Spleen                                                            |      |             |         |             |
| Immature B                                                        | 15.7 | 16.0        | 13.6    | 10.8        |
| Mature B                                                          | 84.2 | 83.9        | 86.3    | 89.1        |
| !                                                                 |      |             |         |             |
| T cell subsets in thymus (%)                                      |      |             |         |             |
| Thymus                                                            |      |             |         |             |
| CD4 <sup>+</sup>                                                  | 15.9 | 16.8        | 18.35   | 23.3        |
| CD4 <sup>+</sup> CD8 <sup>+</sup>                                 | 72.7 | 71.2        | 70.7    | 57.5        |
| CD8 <sup>+</sup>                                                  | 2.5  | 3.1         | 3.1     | 3.7         |
| CD4 <sup>+</sup> CD8 <sup>-</sup>                                 | 1.3  | 2.2         | 1.7     | 4.0         |

<sup>a</sup> In bone marrow, Pro B cells were scored based on B220<sup>+</sup>CD43<sup>+</sup> expression. Pre B cells were CD43<sup>+</sup>B220<sup>+</sup>IgM<sup>-</sup>, and immature B cells were CD43<sup>+</sup>B220<sup>+</sup>IgM<sup>+</sup>. In spleen, immature B cells were B220<sup>+</sup>CD93<sup>+</sup> and mature B cells were B220<sup>+</sup>CD93<sup>-</sup>. Values are averages of at least 3 mice except for bone marrow and thymus, with 1-2 mice per group.

!

**Suppl. FIGURE 2.** TLR9-GFP mice do not develop antinuclear antibodies and have normal lymphocyte development. (A) Sera from four of each 10-12 month old WT, TLR9-GFP mice with one (+/-) or two (++) copies of the TLR9-GFP transgene were extracted from the mouse, and serial dilutions of sera added to slides containing Hep-2 cells. Slides were washed and incubated with FITC-conjugated anti-Ig antibody and cells visualized with a fluorescence microscope. Serum dilution factor as quantification of levels of ANA was calculated at the dilution factor at which no signal could be detected. (B) T and B cell subsets were determined in spleen, bone marrow and thymus based on expression of surface markers.
